# Supplementary material for: Dual-Action Costs and Benefits in a Uni-Modal Single-Onset Paradigm
Source: Atypon-hosted journal article supplement (doi:10.1027/1618-3169/a000604), 2023-11-01

<https://doi.org/10.1027/1618-3169/a000604>

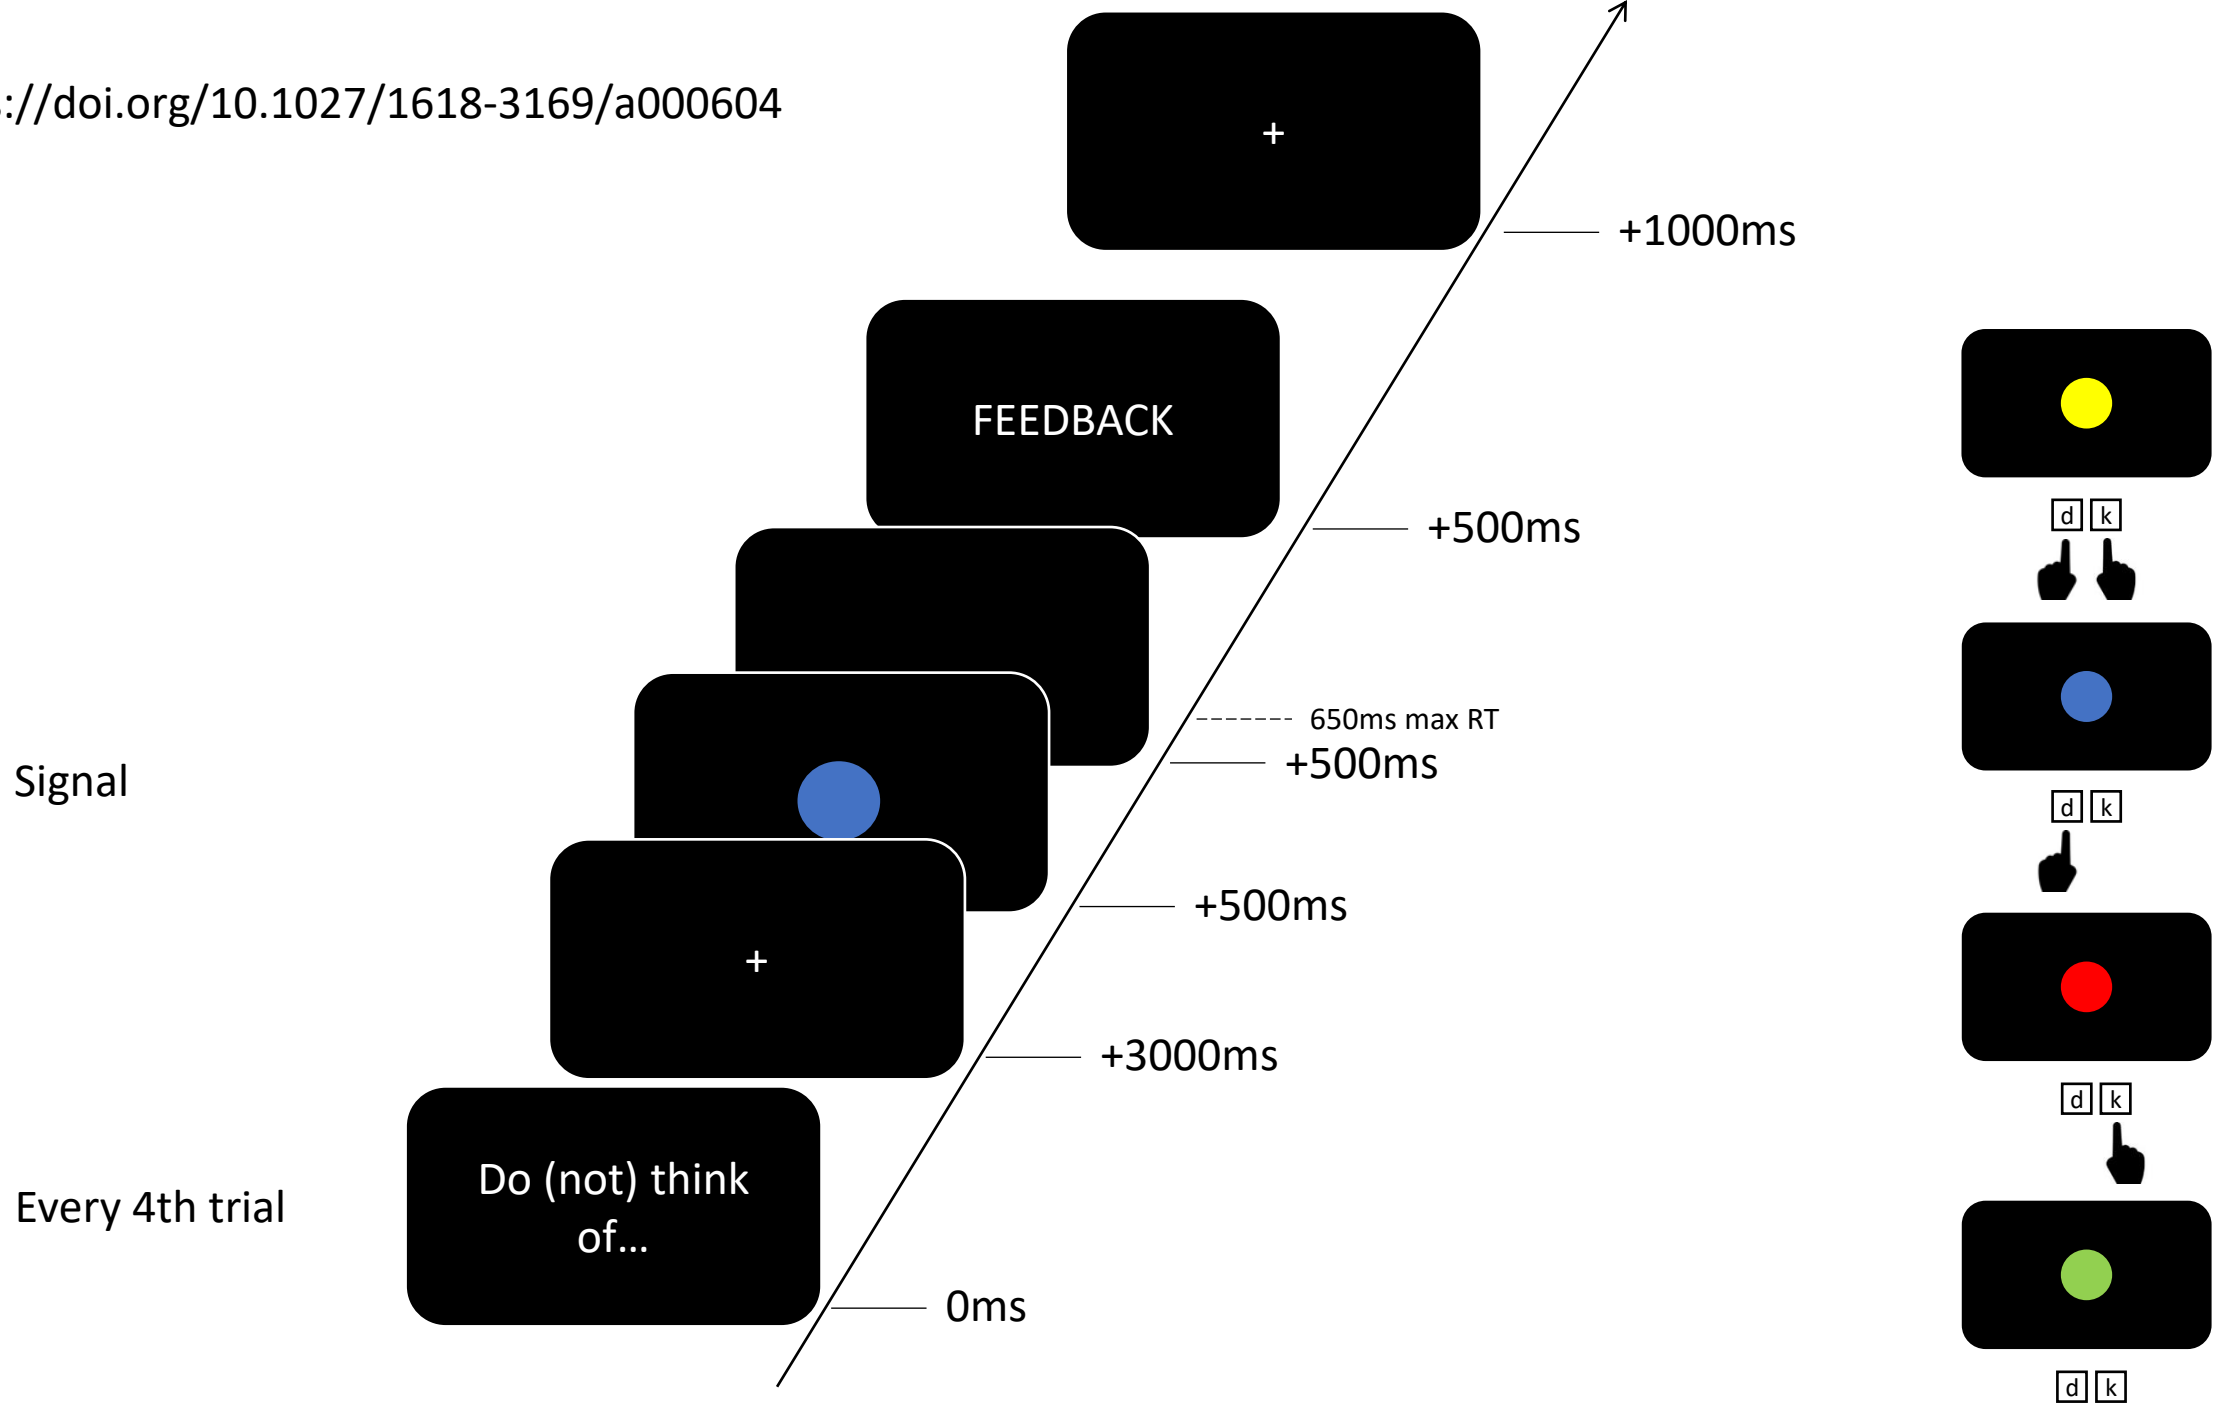

Supplement: 1618-3169_a000604_esm1.pdf [file 1618-3169_a000604_esm1.pdf]
