# Supplementary material for: Dual-Action Costs and Benefits in a Uni-Modal Single-Onset Paradigm
Source: Atypon-hosted journal article supplement (doi:10.1027/1618-3169/a000604), 2023-11-01
Supplement: 1618-3169_a000604_esm2.pdf [file 1618-3169_a000604_esm2.pdf]

### Supplementary Materials

**Data Analysis.** We report the analysis of ERs and RTs as a function of the within-subject independent variables signal (null, left, right, dual) and mode (“Think of [x]” = think\_x, “Do not think of [x]” = suppress\_x, “Think of anything” = free).

RTs were only analyzed for correct trials (i.e., where the response corresponded to the signal), reducing the factor (current) signal to three levels since responses in the null condition were – by definition – incorrect. We report corrected degrees of freedom (Greenhouse & Geisser, 1959) where appropriate.

### Results

**Error Data.** The main effect of signal ( $F(2.62, 68.15) = 31.35, p < .001, \hat{\eta}_p^2 = .547$ ) was significant, but the main effect of mode ( $F(1.87, 48.63) = 0.58, p = .555, \hat{\eta}_p^2 = .022$ ) and the interaction of Signal×Mode ( $F(4.59, 119.36) = 1.52, p = .194, \hat{\eta}_p^2 = .055$ ; see Figure 1) were not.

**Reaction Time Data.** The main effect of signal ( $F(1.95, 50.70) = 11.74, p < .001, \hat{\eta}_p^2 = .311$ ) was significant, but the main effect of mode ( $F(1.84, 47.82) = 0.86, p = .423, \hat{\eta}_p^2 = .032$ ) and the interaction of Signal×Mode ( $F(3.08, 80.06) = 1.27, p = .289, \hat{\eta}_p^2 = .047$ ; see Figure 1) were not.

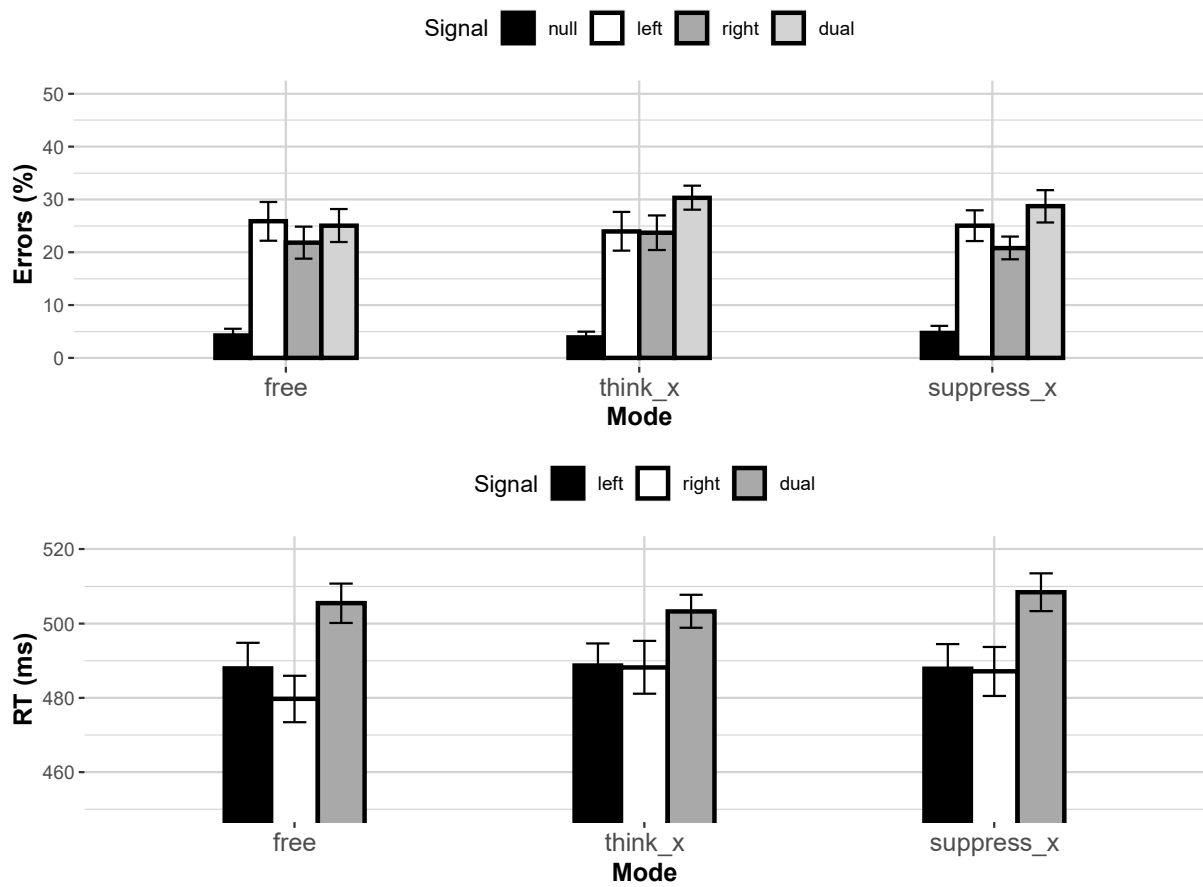

Figure 1. ERs (top panel) and RTs (bottom panel) as a function of current signal and mode. Error bars represent SE.
